# Supplementary material
Source: publisher figshare collection journal article supplement (https://sage.figshare.com/ndownloader/files/17459444)
Supplement: Supplementary file 1 [file 17459444]

### Appendix: Regional Trade Agreements (RTAs) Country List

| Country                    | EAC      | ECOWAS   | COMESA   | SADC     | Number of RTAs |
|----------------------------|----------|----------|----------|----------|----------------|
| Benin                      |          | ✓        |          |          | 1              |
| Burkina-Faso               |          | ✓        |          |          | 1              |
| Burundi                    | ✓        |          | ✓        |          | 2              |
| Ethiopia                   |          |          | ✓        |          | 1              |
| Ghana                      |          | ✓        |          |          | 1              |
| Kenya                      | ✓        |          | ✓        |          | 2              |
| Malawi                     |          |          | ✓        | ✓        | 2              |
| Mali                       |          | ✓        |          |          | 1              |
| Mozambique                 |          |          |          | ✓        | 1              |
| Rwanda                     | ✓        |          | ✓        |          | 2              |
| Senegal                    |          | ✓        |          |          | 1              |
| Tanzania                   | ✓        |          |          | ✓        | 2              |
| Uganda                     | ✓        |          | ✓        |          | 2              |
| <b>Number of Countries</b> | <b>5</b> | <b>5</b> | <b>6</b> | <b>3</b> |                |

*EAC=East African Community; ECOWAS=Economic Community of West African States; COMESA= Common Market for Eastern and Southern Africa; SADC=Southern Africa Development Community*
